# Supplementary material for: In vivo emergence of ceftazidime-avibactam resistance and loss of hypermucoviscosity in carbapenem-resistant Klebsiella pneumoniae during antibiotics treatment
Source: Research Square preprint supplement (doi:10.21203/rs.3.rs-1794863/v1), 2022-06-29
Supplement: Supplementary file 1 [file c869f8fe3222242e654c9b5c.docx]

| Replicon | Position | FK8578 | FK8695 | Type | Gene | Product |
| --- | --- | --- | --- | --- | --- | --- |
| Chromosome | 2828018 | C | A | Missense variant |  | Hypothetical protein |
| Plasmid1 | 2312 | T | G | Missense variant | *bla*KPC-2 | Beta-lactamase |
| Plasmid1 | 82857 | CCTGCTA | C | Inframe deletion |  | Hypothetical protein |
| Plasmid2 | 17078 | G | GC | Inframe deletion | *rmpA* | Regulator of mucoid phenotype A |

Table S1 The mutations of FK8695 compared with FK8578.
